# Supplementary material for: Hashimoto’s thyroiditis might increase polycystic ovary syndrome and associated comorbidities risks in Asia
Source: PubMed Central journal article supplement — Ann Transl Med. 2020 Jun;8(11):684. doi: 10.21037/atm-19-4763 (PMC7327368; doi:10.21037/atm-19-4763), 2020-06
Supplement: atm-08-11-684-dss.pdf [file atm-08-11-684-dss.pdf]

## Data Sharing Statement

|                     |                                                                                             |                                                                                                                                                                                                                                                                                                                                                                                                                                                                                                                                                                                                                                                                                  |
|---------------------|---------------------------------------------------------------------------------------------|----------------------------------------------------------------------------------------------------------------------------------------------------------------------------------------------------------------------------------------------------------------------------------------------------------------------------------------------------------------------------------------------------------------------------------------------------------------------------------------------------------------------------------------------------------------------------------------------------------------------------------------------------------------------------------|
| <b>Article Info</b> | <a href="http://dx.doi.org/10.21037/atm-19-4763">http://dx.doi.org/10.21037/atm-19-4763</a> |                                                                                                                                                                                                                                                                                                                                                                                                                                                                                                                                                                                                                                                                                  |
| <b>Item</b>         | <b>Question</b>                                                                             | <b>Authors' Response<br/>(place "-" if not applicable)</b>                                                                                                                                                                                                                                                                                                                                                                                                                                                                                                                                                                                                                       |
| 1                   | Would you like to share data collected for your study to others?                            | -                                                                                                                                                                                                                                                                                                                                                                                                                                                                                                                                                                                                                                                                                |
| 2                   | If not, would you like to share the reason for your decision?                               | <p>The dataset used in this study is held by the Taiwan Ministry of Health and Welfare (MOHW). The Ministry of Health and Welfare must approve our application to access this data. Any researcher interested in accessing this dataset can submit an application form to the Ministry of Health and Welfare requesting access. Please contact the staff of MOHW (Email: <a href="mailto:stcarolwu@mohw.gov.tw">stcarolwu@mohw.gov.tw</a>) for further assistance. Taiwan Ministry of Health and Welfare Address: No.488, Sec. 6, Zhongxiao E. Rd., Nangang Dist., Taipei City 115, Taiwan (R.O.C.). Phone: +886-2-8590-6848.</p> <p>All relevant data are within the paper.</p> |
| 3                   | What data in particular will be shared?                                                     | -                                                                                                                                                                                                                                                                                                                                                                                                                                                                                                                                                                                                                                                                                |

|    |                                                                                                                                                    |   |
|----|----------------------------------------------------------------------------------------------------------------------------------------------------|---|
| 4  | Any other documents will be share? Such as study protocol, statistical analysis plan, informed consent form, clinical study report, analytic code. | - |
| 5  | When will data availability begin?                                                                                                                 | - |
| 6  | When will data availability end?                                                                                                                   | - |
| 7  | To whom will you share the data?                                                                                                                   | - |
| 8  | For what type of analysis or purpose?                                                                                                              | - |
| 9  | How or where can the data/documents be obtained?                                                                                                   | - |
| 10 | Any other restrictions?                                                                                                                            | - |
